# Supplementary material
Source: PubMed Central journal article supplement (PMC1948926)

**A**

Adult Split Replication Group 1

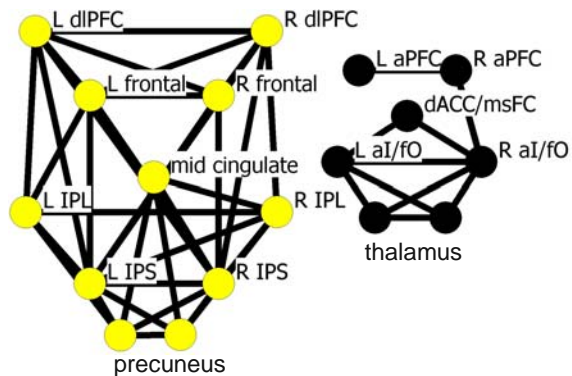

Adult Split Replication Group 2

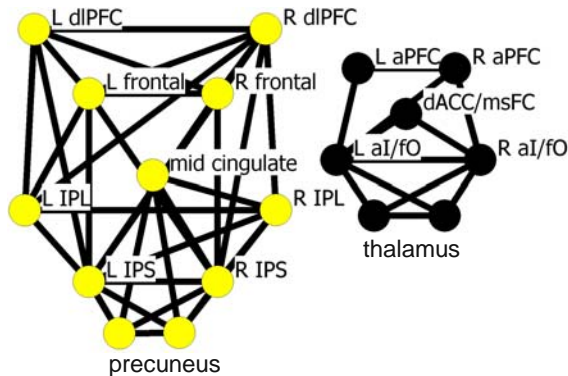**B**

Child Split Replication Group 1

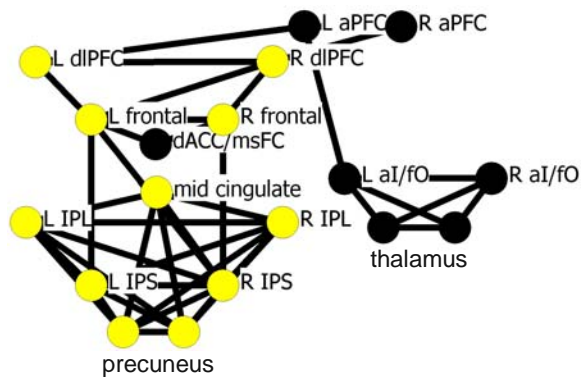

Child Split Replication Group 2

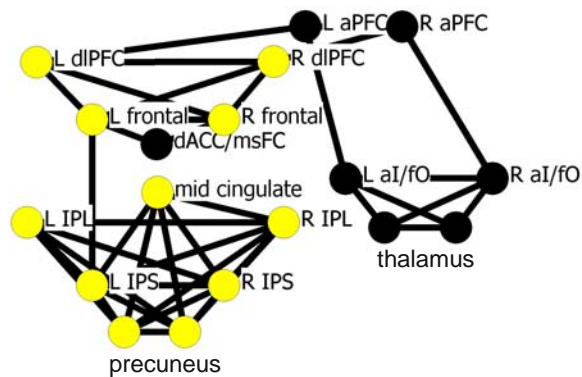

Supplement: pnas_0705843104_2.pdf [file pnas_0705843104_2.pdf]
