# Supplementary material
Source: PubMed Central journal article supplement (PMC1948926)
Supplement: pnas_0705843104_5.pdf [file pnas_0705843104_5.pdf]

**Table 1. List of abbreviations**

---

|              |                                                                 |
|--------------|-----------------------------------------------------------------|
| IPS          | intraparietal sulcus                                            |
| dF           | dorsal frontal                                                  |
| midcingulate | midcingulate                                                    |
| IPL          | inferior parietal lobule                                        |
| dIPFC        | dorsolateral prefrontal cortex                                  |
| al/fo        | anterior insula/frontal operculum                               |
| dACC/msFC    | dorsal anterior cingulate cortex/medial superior frontal cortex |
| aPFC         | anterior prefrontal cortex                                      |
| aT           | anterior thalamus                                               |
| TPJ          | temporoparietal junction                                        |
| midtemporal  | midtemporal                                                     |
| vmPFC        | ventromedial prefrontal cortex                                  |

---
