# Supplementary material
Source: PubMed Central journal article supplement (PMC1948926)
Supplement: pnas_0705843104_6.pdf [file pnas_0705843104_6.pdf]

**Table 2. ROI coordinates**

| ROI              | Coordinates |     |     | Component |
|------------------|-------------|-----|-----|-----------|
|                  | x           | y   | z   |           |
| R IPS            | 30          | -61 | 39  | 1         |
| L IPS            | -31         | -59 | 42  | 1         |
| R frontal cortex | 41          | 3   | 36  | 1         |
| L frontal cortex | -41         | 3   | 36  | 1         |
| R precuneus      | 10          | -69 | 39  | 1         |
| L precuneus      | -9          | -72 | 37  | 1         |
| mid cingulate    | 0           | -29 | 30  | 1         |
| R IPL            | 51          | -47 | 42  | 1         |
| L IPL            | -51         | -51 | 36  | 1         |
| R dIPFC          | 43          | 22  | 34  | 1         |
| L dIPFC          | -43         | 22  | 34  | 1         |
| R al/fO          | 36          | 16  | 4   | 2         |
| L al/fO          | -35         | 14  | 5   | 2         |
| dACC/msFC        | -1          | 10  | 46  | 2         |
| R aPFC           | 27          | 50  | 23  | 2         |
| L aPFC           | -28         | 51  | 15  | 2         |
| R ant thalamus   | 10          | -15 | 8   | 2         |
| L ant thalamus   | -12         | -15 | 7   | 2         |
| R lat cerebellum | 31          | -61 | -29 | 3         |
| L lat cerebellum | -32         | -66 | -29 | 3         |
| R inf cerebellum | 18          | -80 | -33 | 3         |
| L inf cerebellum | -19         | -78 | -33 | 3         |
| R TPJ            | 53          | -46 | 17  | 4         |
| L TPJ            | -53         | -46 | 17  | 4         |
| R mid occipital  | 27          | -89 | 3   | 5         |
| L mid occipital  | -27         | -89 | 3   | 5         |
| R lingual        | 8           | -82 | 4   | 5         |
| L lingual        | -8          | -82 | 4   | 5         |
| R post temporal  | 44          | -74 | 26  | 6         |
| L post temporal  | -40         | -78 | 24  | 6         |
| R post cingulate | 10          | -56 | 16  | 6         |
| L post cingulate | -11         | -57 | 13  | 6         |
| R fusiform       | 35          | -65 | -9  | 6         |
| L fusiform       | -34         | -62 | -15 | 6         |
| R ant fusiform   | 25          | -44 | -12 | 6         |
| L ant fusiform   | -25         | -44 | -12 | 6         |
| R mid temporal   | 51          | -33 | -2  | 7         |
| L mid temporal   | -53         | -31 | -5  | 7         |
| vmPFC            | 1           | 31  | -2  | 8         |

ROIs are group by components based on .  
 Dosenbach NU, Fair DA, Miezin FM, Cohen AL, Wenger KK, Dosenbach  
 RAT, Fox MD, Snyder AZ, Vincent JL, Raichle ME, *et al.* (2007) *Proc Natl  
 Acad Sci USA* 104:11073-11078.
