# Supplementary material
Source: PubMed Central journal article supplement (PMC1948926)
Supplement: pnas_0705843104_7.pdf [file pnas_0705843104_7.pdf]

**Table 3. MR scanning parameters**

|                | 176 subjects          |                | 34 subjects           |               |
|----------------|-----------------------|----------------|-----------------------|---------------|
|                | T1-weighted<br>MPRAGE | BOLD           | T1-weighted<br>MPRAGE | BOLD          |
| Field strength | 1.5T                  | 1.5T           | 1.5T                  | 1.5T          |
| TR             | 9.7 msec              | 2.5 sec        | 9.7 msec              | 3 sec         |
| TE             | 4 msec                | 50 msec        | 4 msec                | 50 msec       |
| Flip angle     | 12                    | 90             | 10                    | 90            |
| Voxel size     | 1.0 × 1.0 × 1.25 mm   | 3.75 × 3.75 mm | 1.0 × 1.0 × 1.25 mm   | 3.75 × 3.75mm |
