# Supplementary material
Source: PubMed Central journal article supplement (PMC1948926)

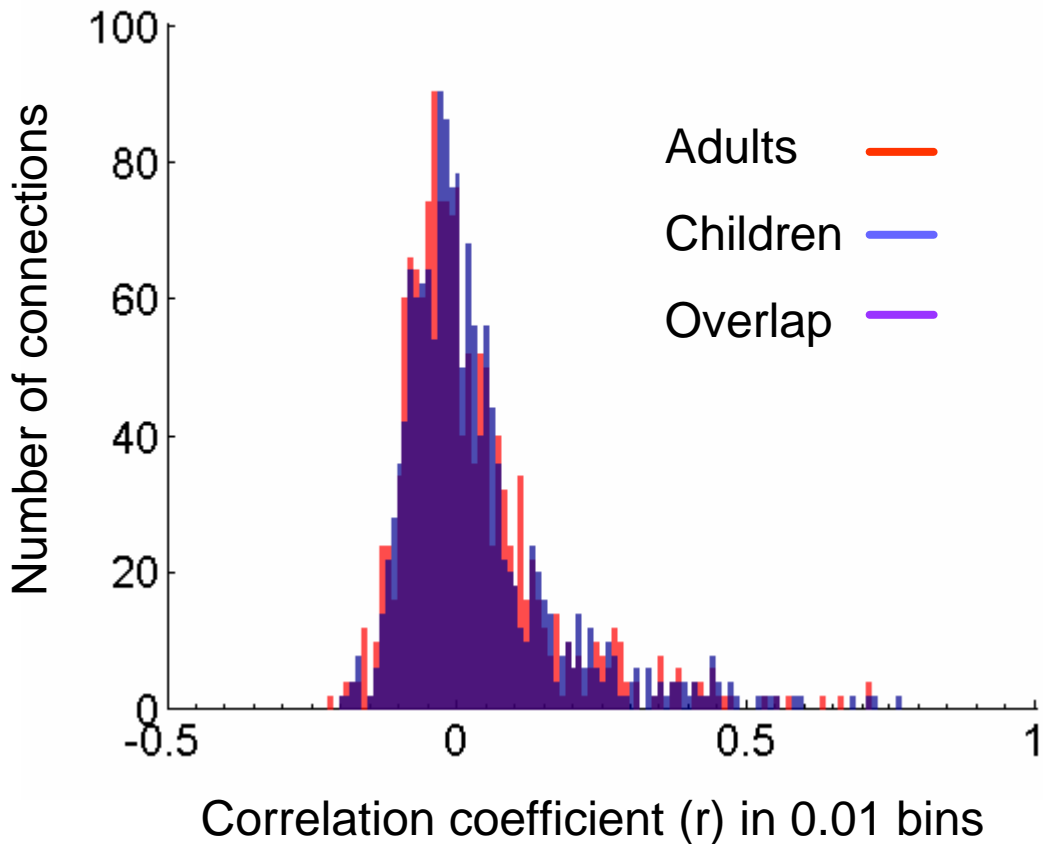

Supplement: pnas_0705843104_1.pdf [file pnas_0705843104_1.pdf]

**Children**

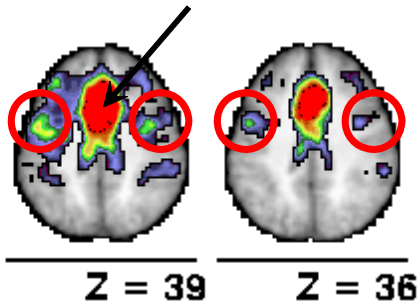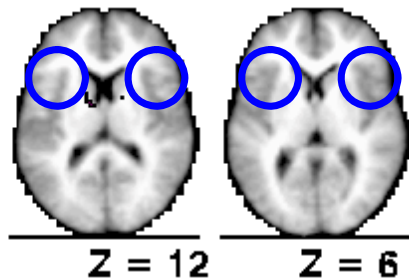

**Adults**

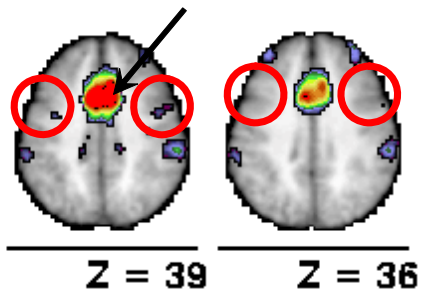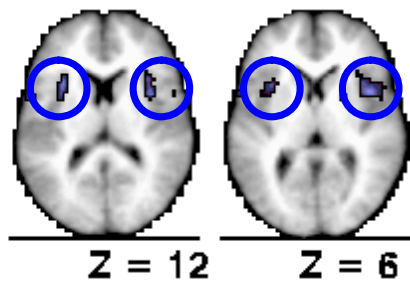

Supplement: pnas_0705843104_3.pdf [file pnas_0705843104_3.pdf]

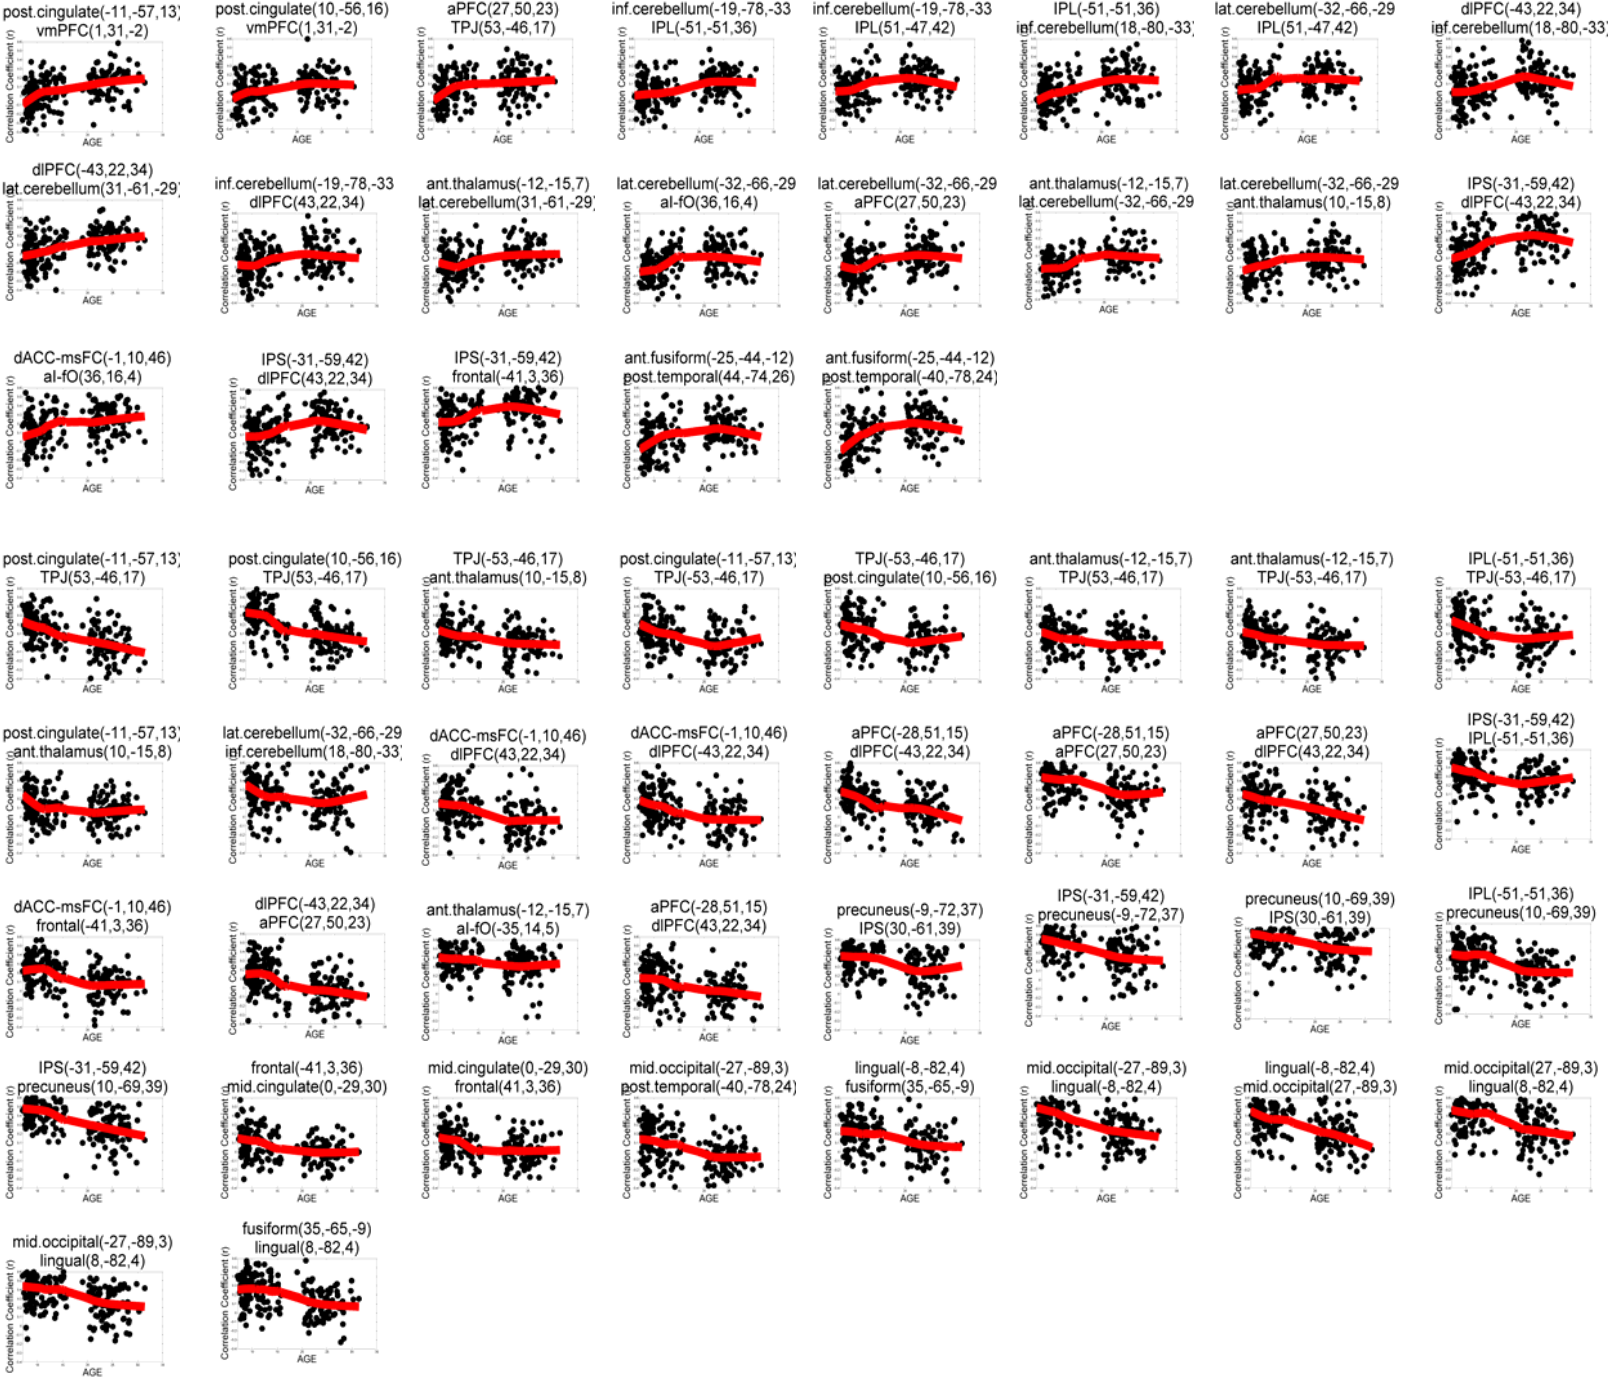

Supplement: pnas_0705843104_4.pdf [file pnas_0705843104_4.pdf]
